# Supplementary material
Source: PubMed Central journal article supplement (PMC1746977)
Supplement: thorax_59_3_194__1.pdf [file thorax_59_3_194__1.pdf]

**Table S1** Results of regression models for FEV<sub>1</sub>/FVC adjusted for log urine cadmium/creatinine, age, race/ethnicity, sex, education, job category, body mass index, years ago quit smoking (for former smokers), pack years of cigarettes, and cotinine level. From the Third National Health and Nutrition Examination Survey, 1988–94

| Variable                             | Current smokers        | Former smokers         | Never smokers          |
|--------------------------------------|------------------------|------------------------|------------------------|
| Log cadmium/creatinine               | -0.86 (-1.36 to -0.36) | -0.83 (-1.23 to -0.43) | -0.07 (-0.25 to 0.11)  |
| Age (10 years)                       | -2.99 (-3.35 to -2.63) | -2.73 (-3.03 to -2.43) | -2.02 (-2.14 to -1.90) |
| Race/ethnicity                       |                        |                        |                        |
| White                                | 0                      | 0                      | 0                      |
| Black                                | 2.40 (1.70 to 3.10)    | 2.00 (0.96 to 3.04)    | 1.53 (0.97 to 2.09)    |
| Mexican-American                     | 2.00 (1.06 to 2.94)    | 2.56 (1.32 to 3.80)    | 1.42 (0.74 to 2.10)    |
| Other                                | 2.26 (1.18 to 3.34)    | 2.88 (0.88 to 4.88)    | 1.25 (0.29 to 2.21)    |
| Sex                                  |                        |                        |                        |
| Male                                 | -2.32 (-2.96 to -1.68) | -2.05 (-2.89 to -1.21) | -2.24 (-2.80 to -1.68) |
| Female                               | 0                      | 0                      | 0                      |
| Education level (years)              |                        |                        |                        |
| <12                                  | -0.30 (-1.38 to 0.78)  | -0.69 (-2.11 to 0.73)  | -0.01 (-0.77 to 0.75)  |
| 12                                   | -0.14 (-0.94 to 0.66)  | -0.86 (-2.02 to 0.30)  | 0.06 (-0.48 to 0.60)   |
| ≥13 years                            | 0                      | 0                      | 0                      |
| Job category                         |                        |                        |                        |
| Agriculture                          | -0.82 (-1.86 to 0.22)  | -0.65 (-1.99 to 0.69)  | -0.55 (-1.65 to 0.55)  |
| Mining/manufacturing                 | 0.38 (-0.40 to 1.16)   | -0.17 (-1.55 to 1.21)  | -0.28 (-1.06 to 0.50)  |
| Transport                            | 0.96 (-0.84 to 2.76)   | -1.19 (-3.19 to 0.81)  | -0.93 (-2.51 to 0.65)  |
| Service                              | -0.46 (-1.24 to 0.32)  | -0.68 (-1.72 to 0.36)  | -0.14 (-0.68 to 0.40)  |
| Unemployed                           | -0.24 (-2.04 to 1.56)  | -0.51 (-2.21 to 1.19)  | -0.74 (-1.78 to 0.30)  |
| Retail                               | 0                      | 0                      | 0                      |
| Body mass index (kg/m <sup>2</sup> ) |                        |                        |                        |

| Variable                 | Current smokers        | Former smokers         | Never smokers         |
|--------------------------|------------------------|------------------------|-----------------------|
| <18.5                    | -0.77 (-3.69 to 2.15)  | 0.88 (-9.14 to 10.90)  | 3.17 (1.55 to 4.79)   |
| 18.5–24                  | 0                      | 0                      | 0                     |
| 25–29                    | 0.29 (-0.47 to 1.05)   | 1.31 (0.51 to 2.11)    | -0.30 (-0.86 to 0.26) |
| ≥30                      | 0.88 (-0.08 to 1.84)   | 1.88 (1.10 to 2.66)    | 0.10 (-0.44 to 0.64)  |
| Years ago quit smoking   |                        |                        |                       |
| cigarettes               |                        |                        |                       |
| >0–10                    |                        | -4.73 (-6.61 to -2.85) |                       |
| >10–20                   |                        | -4.05 (-5.87 to -2.23) |                       |
| >20–30                   |                        | -3.37 (-5.39 to -1.35) |                       |
| >30–40                   |                        | -1.73 (-4.27 to 0.81)  |                       |
| >40                      |                        | 0                      |                       |
| Unknown                  |                        | -5.24 (-8.10 to -2.38) |                       |
| Pack years of cigarettes |                        |                        |                       |
| ≥60                      | -6.32 (-9.56 to -3.08) | -7.53 (-9.99 to -5.07) |                       |
| ≤30–59                   | -4.30 (-5.80 to -2.80) | -4.66 (-6.94 to -2.38) |                       |
| >0–29                    | -1.99 (-3.37 to -0.61) | -3.15 (-5.05 to -1.25) |                       |
| 0                        | 0                      | 0                      |                       |
| Cotinine level (ng/ml)*  |                        |                        |                       |
| >100                     | -1.40 (-4.90 to 2.10)  | 0.36 (-1.26 to 1.98)   | -0.97 (-2.51 to 0.57) |
| ≤15–100                  | -0.39 (-3.93 to 3.15)  | -0.76 (-3.42 to 1.90)  | -1.31 (-3.25 to 0.63) |
| ≤0.3–15                  | -0.05 (-3.07 to 2.97)  | 0.61 (-0.83 to 2.05)   | 0.21 (-0.45 to 0.87)  |
| 0.05–0.29                | 0.36 (-3.66 to 4.38)   | 0.27 (-0.99 to 1.53)   | 0.04 (-0.68 to 0.76)  |
| Non-detectable           | 0                      | 0                      | 0                     |
| Missing                  | -1.00 (-5.00 to 3.00)  | 0.02 (-3.04 to 3.08)   | 0.01 (-0.93 to 0.95)  |
| $r^2$ of model           | 0.36                   | 0.35                   | 0.25                  |

\*Some never and former smokers had cotinine levels >15♣ng/ml, suggesting

misclassification of smoking status.
