# Supplementary material
Source: PubMed Central journal article supplement (PMC1746977)
Supplement: thorax_59_3_194__2.pdf [file thorax_59_3_194__2.pdf]

**Table S2** Results of regression models for FEV<sub>1</sub> adjusted for log urine cadmium/creatinine, age, race/ethnicity, sex, education, job category, body mass index, years ago quit smoking (for former smokers), pack years of cigarettes, and cotinine level. From the Third National Health and Nutrition Examination Survey, 1988–94

| Variable                             | Current smokers         | Former smokers           | Never smokers           |
|--------------------------------------|-------------------------|--------------------------|-------------------------|
| Log cadmium/creatinine               | −2.06 (−2.86 to −1.26)  | −1.95 (−2.87 to −1.03)   | −0.18 (−0.60 to 0.24)   |
| Age (10 years)                       | −2.51 (−3.01 to −2.01)  | −1.95 (−2.49 to −1.41)   | 0.03 (−0.29 to 0.35)    |
| Race/ethnicity                       |                         |                          |                         |
| White                                | 0                       | 0                        | 0                       |
| Black                                | 4.22 (2.92 to 5.52)     | 3.17 (1.11 to 5.23)      | 1.41 (0.29 to 2.53)     |
| Mexican-American                     | 3.40 (1.60 to 5.20)     | 2.54 (0.52 to 4.56)      | 1.22 (0.00 to 2.44)     |
| Other                                | −0.53 (−4.59 to 3.53)   | −2.91 (−6.21 to 0.39)    | −6.79 (−9.09 to −4.49)  |
| Sex                                  |                         |                          |                         |
| Male                                 | −0.39 (−1.51 to 0.73)   | −0.87 (−2.29 to 0.55)    | −0.24 (−1.16 to 0.68)   |
| Female                               | 0                       | 0                        | 0                       |
| Education level (years)              |                         |                          |                         |
| <12                                  | −1.77 (−3.37 to −0.17)  | −2.66 (−4.60 to −0.72)   | −1.33 (−2.93 to 0.27)   |
| 12                                   | −1.13 (−2.45 to 0.19)   | −1.82 (−3.42 to −0.22)   | −0.72 (−2.04 to 0.60)   |
| ≥13                                  | 0                       | 0                        | 0                       |
| Job category                         |                         |                          |                         |
| Agriculture                          | 1.11 (−1.45 to 3.67)    | 0.64 (−2.20 to 3.48)     | 0.57 (−1.91 to 3.05)    |
| Mining/manufacturing                 | 0.91 (−1.15 to 2.97)    | 0.42 (−1.42 to 2.26)     | 0.08 (−1.58 to 1.74)    |
| Transport                            | 1.46 (−1.76 to 4.68)    | 2.42 (−1.44 to 6.28)     | 1.90 (−0.86 to 4.66)    |
| Service                              | 1.76 (−0.18 to 3.70)    | 0.12 (−1.80 to 2.04)     | 1.11 (−0.09 to 2.31)    |
| Unemployed                           | 0.70 (−2.36 to 3.76)    | −0.52 (−4.68 to 3.64)    | −1.43 (−3.83 to 0.97)   |
| Retail                               | 0                       | 0                        | 0                       |
| Body mass index (kg/m <sup>2</sup> ) |                         |                          |                         |
| <18.5                                | −7.33 (−11.51 to −3.15) | −14.60 (−27.62 to −1.58) | −8.27 (−11.47 to −5.07) |

| Variable                 | Current smokers          | Former smokers           | Never smokers          |
|--------------------------|--------------------------|--------------------------|------------------------|
| 18.5–24                  | 0                        | 0                        | 0                      |
| 25–29                    | –0.22 (–1.76 to 1.32)    | 1.93 (0.07 to 3.79)      | 1.02 (–0.10 to 2.14)   |
| ≥30                      | –3.32 (–5.06 to –1.58)   | –2.29 (–4.07 to –0.51)   | –2.54 (–3.48 to –1.60) |
| Years ago quit smoking   |                          |                          |                        |
| cigarettes               |                          |                          |                        |
| >0–10                    |                          | –7.98 (–12.16 to –3.80)  |                        |
| >10–20                   |                          | –6.08 (–9.74 to –2.42)   |                        |
| >20–30                   |                          | –4.03 (–7.63 to –0.43)   |                        |
| >30–40                   |                          | –1.67 (–6.99 to 3.65)    |                        |
| >40                      |                          | 0                        |                        |
| Unknown                  |                          | –7.36 (–12.60 to –2.12)  |                        |
| Pack years of cigarettes |                          |                          |                        |
| ≥60                      | –10.94 (–16.82 to –5.06) | –10.65 (–15.75 to –5.55) |                        |
| ≤30–59                   | –7.35 (–10.83 to –3.87)  | –4.70 (–9.72 to 0.32)    |                        |
| >0–29                    | –2.71 (–5.89 to 0.47)    | –2.40 (–6.74 to 1.94)    |                        |
| 0                        | 0                        | 0                        |                        |
| Cotinine level (ng/ml)*  |                          |                          |                        |
| >100                     | –3.39 (–11.73 to 4.95)   | –2.26 (–6.16 to 1.64)    | –4.04 (–7.12 to –0.96) |
| ≤15–100                  | –1.69 (–10.69 to 7.31)   | –3.12 (–8.68 to 2.44)    | –3.45 (–6.95 to 0.05)  |
| ≤0.3–15                  | –1.12 (–9.46 to 7.22)    | –0.21 (–3.71 to 3.29)    | –1.31 (–2.69 to 0.07)  |
| 0.05–0.29                | 4.36 (–5.18 to 13.90)    | –0.36 (–3.64 to 2.92)    | –0.42 (–1.92 to 1.08)  |
| Non-detectable           | 0                        | 0                        | 0                      |
| Missing                  | –3.88 (–13.36 to 5.60)   | –2.96 (–7.70 to 1.78)    | –3.77 (–5.49 to –2.05) |
| $r^2$ of model           | 0.21                     | 0.17                     | 0.05                   |

\*Some never and former smokers had cotinine levels >15♣ng/ml, suggesting

misclassification of smoking status.
