# Supplementary material
Source: PubMed Central journal article supplement (PMC1746977)
Supplement: thorax_59_3_194__3.pdf [file thorax_59_3_194__3.pdf]

**Table S3** Results of regression models for FVC adjusted for log urine cadmium/creatinine, age, race/ethnicity, sex, education, job category, body mass index, years ago quit smoking (for former smokers), pack years of cigarettes, and cotinine level. From the Third National Health and Nutrition Examination Survey, 1988–94

| Variable                             | Current smokers         | Former smokers           | Never smokers            |
|--------------------------------------|-------------------------|--------------------------|--------------------------|
| Log cadmium/creatinine               | -1.34 (-1.98 to -0.70)  | -1.07 (-1.83 to -0.31)   | -0.10 (-0.52 to 0.32)    |
| Age (10 years)                       | -1.38 (-1.86 to -0.90)  | -1.32 (-1.76 to -0.88)   | -0.25 (-0.57 to 0.07)    |
| Race/ethnicity                       |                         |                          |                          |
| White                                | 0                       | 0                        | 0                        |
| Black                                | 3.37 (1.93 to 4.81)     | 2.83 (1.17 to 4.49)      | 1.38 (0.28 to 2.48)      |
| Mexican-American                     | -5.48 (-6.90 to -4.06)  | -8.47 (-10.23 to -6.71)  | -3.26 (-4.34 to -2.18)   |
| Other                                | -3.13 (-7.03 to 0.77)   | -6.12 (-8.72 to -3.52)   | -7.90 (-10.26 to -5.54)  |
| Sex                                  |                         |                          |                          |
| Male                                 | -0.38 (-1.64 to 0.88)   | -1.31 (-2.75 to 0.13)    | -1.35 (-2.17 to -0.53)   |
| Female                               | 0                       | 0                        | 0                        |
| Education level (years)              |                         |                          |                          |
| <12                                  | -1.37 (-2.83 to 0.09)   | -1.89 (-3.99 to 0.21)    | -1.18 (-2.80 to 0.44)    |
| 12                                   | -0.83 (-2.09 to 0.43)   | -0.75 (-2.17 to 0.67)    | -0.77 (-1.97 to 0.43)    |
| ≥13                                  | 0                       | 0                        | 0                        |
| Job category                         |                         |                          |                          |
| Agriculture                          | 1.89 (-0.57 to 4.35)    | 1.32 (-1.64 to 4.28)     | 1.06 (-1.32 to 3.44)     |
| Mining/manufacturing                 | 0.47 (-1.31 to 2.25)    | 0.49 (-1.67 to 2.65)     | 0.35 (-1.43 to 2.13)     |
| Transport                            | 0.52 (-1.72 to 2.76)    | 3.79 (0.21 to 7.37)      | 2.87 (0.23 to 5.51)      |
| Service                              | 2.34 (0.62 to 4.06)     | 0.67 (-1.15 to 2.49)     | 1.16 (-0.08 to 2.40)     |
| Unemployed                           | 1.30 (-1.74 to 4.34)    | 0.20 (-3.00 to 3.40)     | -0.16 (-2.38 to 2.06)    |
| Retail                               | 0                       | 0                        | 0                        |
| Body mass index (kg/m <sup>2</sup> ) |                         |                          |                          |
| <18.5                                | -7.31 (-10.05 to -4.57) | -18.28 (-27.90 to -8.66) | -11.83 (-14.55 to -9.11) |

| Variable                 | Current smokers        | Former smokers         | Never smokers          |
|--------------------------|------------------------|------------------------|------------------------|
| 18.5–24                  | 0                      | 0                      | 0                      |
| 25–29                    | –0.81 (–2.01 to 0.39)  | 0.27 (–1.33 to 1.87)   | 1.33 (0.31 to 2.35)    |
| ≥30                      | –4.76 (–6.66 to –2.86) | –4.88 (–6.26 to –3.50) | –2.84 (–3.82 to –1.86) |
| Years ago quit smoking   |                        |                        |                        |
| cigarettes               |                        |                        |                        |
| >0–10                    |                        | –2.73 (–6.33 to 0.87)  |                        |
| >10–20                   |                        | –1.54 (–4.66 to 1.58)  |                        |
| >20–30                   |                        | –0.16 (–3.62 to 3.30)  |                        |
| >30–40                   |                        | 0.47 (–3.73 to 4.67)   |                        |
| >40                      |                        | 0                      |                        |
| Unknown                  |                        | –1.07 (–5.17 to 3.03)  |                        |
| Pack years of cigarettes |                        |                        |                        |
| ≥60                      | –4.32 (–8.32 to –0.32) | –1.85 (–6.19 to 2.49)  |                        |
| ≤30–59                   | –3.00 (–6.42 to 0.42)  | 0.69 (–3.39 to 4.77)   |                        |
| >0–29                    | –0.42 (–3.40 to 2.56)  | 1.03 (–2.79 to 4.85)   |                        |
| 0                        | 0.00 (0.00 to 0.00)    | 0                      |                        |
| Cotinine level (ng/ml)*  |                        |                        |                        |
| >100                     | –1.22 (–6.48 to 4.04)  | –2.47 (–5.75 to 0.81)  | –2.74 (–5.52 to 0.04)  |
| ≤15–100                  | –0.49 (–6.57 to 5.59)  | –2.24 (–7.64 to 3.16)  | –2.07 (–4.99 to 0.85)  |
| ≤0.3–15                  | –0.23 (–6.35 to 5.89)  | –0.90 (–3.70 to 1.90)  | –1.71 (–3.17 to –0.25) |
| 0.05–0.29                | 5.26 (–1.54 to 12.06)  | –0.55 (–3.61 to 2.51)  | –0.68 (–2.16 to 0.80)  |
| Non-detectable           | 0                      | 0                      | 0                      |
| Missing                  | –2.23 (–8.27 to 3.81)  | –2.72 (–6.30 to 0.86)  | –3.85 (–5.65 to –2.05) |
| $r^2$ of model           | 0.12                   | 0.12                   | 0.07                   |

\*Some never and former smokers had cotinine levels >15♣ng/ml, suggesting misclassification of smoking status.
