# Supplementary material
Source: PubMed Central journal article supplement (PMC1746977)
Supplement: thorax_59_3_194__4.pdf [file thorax_59_3_194__4.pdf]

**Table S4** Results of logistic regression models for GOLD stage 2 or worse COPD\* adjusted for log urine cadmium/creatinine, age, race/ethnicity, sex, education, job category, body mass index, years ago quit smoking (for former smokers), pack years of cigarettes, and cotinine level. From the Third National Health and Nutrition Examination Survey, 1988–94

| Variable                             | Current smokers     | Former smokers        | Never smokers       |
|--------------------------------------|---------------------|-----------------------|---------------------|
| Log cadmium/creatinine               | 2.29 (1.67 to 3.15) | 1.90 (1.38 to 2.63)   | 1.25 (0.98 to 1.60) |
| Age (10 years)                       | 1.81 (1.57 to 2.09) | 2.26 (1.95 to 2.63)   | 1.57 (1.39 to 1.78) |
| Race/ethnicity                       |                     |                       |                     |
| White                                | 1                   | 1                     | 1                   |
| Black                                | 0.66 (0.44 to 0.99) | 0.95 (0.60 to 1.52)   | 1.18 (0.80 to 1.72) |
| Mexican-American                     | 0.45 (0.25 to 0.80) | 0.88 (0.44 to 1.77)   | 0.73 (0.44 to 1.24) |
| Other                                | 0.78 (0.35 to 1.76) | 1.10 (0.47 to 2.59)   | 1.93 (1.07 to 3.48) |
| Sex                                  |                     |                       |                     |
| Male                                 | 1.31 (0.87 to 1.96) | 1.61 (1.05 to 2.46)   | 1.51 (0.88 to 2.58) |
| Female                               | 1                   | 1                     | 1                   |
| Education level (years)              |                     |                       |                     |
| <12                                  | 1.39 (0.85 to 2.28) | 1.65 (1.03 to 2.64)   | 1.47 (0.96 to 2.25) |
| 12                                   | 1.21 (0.84 to 1.76) | 1.98 (1.28 to 3.06)   | 0.96 (0.57 to 1.63) |
| ≥13                                  | 1                   | 1                     | 1                   |
| Job category                         |                     |                       |                     |
| Agriculture                          | 1.71 (0.80 to 3.65) | 0.98 (0.53 to 1.81)   | 0.68 (0.37 to 1.24) |
| Mining/manufacturing                 | 0.79 (0.51 to 1.21) | 0.79 (0.49 to 1.27)   | 0.96 (0.53 to 1.74) |
| Transport                            | 0.98 (0.45 to 2.14) | 1.05 (0.50 to 2.21)   | 1.13 (0.28 to 4.56) |
| Service                              | 0.97 (0.61 to 1.55) | 0.64 (0.38 to 1.09)   | 0.73 (0.37 to 1.41) |
| Unemployed                           | 0.87 (0.39 to 1.91) | 0.66 (0.22 to 2.05)   | 1.50 (0.70 to 3.21) |
| Retail                               | 1                   | 1                     | 1                   |
| Body mass index (kg/m <sup>2</sup> ) |                     |                       |                     |
| <18.5                                | 2.32 (1.14 to 4.73) | 17.34 (4.21 to 71.38) | 1.33 (0.47 to 3.74) |
| 18.5–24                              | 1                   | 1                     | 1                   |

| Variable                          | Current smokers      | Former smokers        | Never smokers       |
|-----------------------------------|----------------------|-----------------------|---------------------|
| 25–29                             | 0.91 (0.61 to 1.35)  | 0.71 (0.51 to 1.00)   | 0.60 (0.38 to 0.94) |
| ≥30                               | 1.46 (0.89 to 2.37)  | 1.05 (0.72 to 1.53)   | 0.68 (0.45 to 1.04) |
| Years ago quit smoking cigarettes |                      |                       |                     |
| >0–10                             |                      | 3.83 (1.30 to 11.30)  |                     |
| >10–20                            |                      | 4.25 (1.41 to 12.79)  |                     |
| >20–30                            |                      | 1.73 (0.59 to 5.05)   |                     |
| >30–40                            |                      | 2.17 (0.58 to 8.17)   |                     |
| >40                               |                      | 1                     |                     |
| Unknown                           |                      | 5.13 (1.38 to 19.09)  |                     |
| Pack years of cigarettes          |                      |                       |                     |
| ≥60                               | 4.96 (1.62 to 15.23) | 10.97 (2.05 to 58.80) |                     |
| ≤30–59                            | 2.92 (1.15 to 7.42)  | 5.17 (1.02 to 26.31)  |                     |
| >0–29                             | 1.56 (0.65 to 3.73)  | 3.94 (0.75 to 20.78)  |                     |
| 0                                 | 1                    | 1                     |                     |
| Cotinine level (ng/ml)†           |                      |                       |                     |
| >100                              | 1.04 (0.45 to 2.41)  | 1.10 (0.48 to 2.50)   | 0.61 (0.30 to 1.25) |
| ≤15–100                           | 0.86 (0.33 to 2.23)  | 1.97 (0.59 to 6.60)   | 1.14 (0.35 to 3.75) |
| ≤0.3–15                           | 0.48 (0.11 to 2.17)  | 1.20 (0.66 to 2.20)   | 1.05 (0.57 to 1.94) |
| 0.05–0.29                         | 0.11 (0.01 to 0.87)  | 1.22 (0.70 to 2.12)   | 1.19 (0.71 to 2.00) |
| Non-detectable                    |                      | 1                     | 1                   |
| Missing                           | 1                    | 1.69 (0.37 to 7.70)   | 0.75 (0.28 to 2.03) |
| $r^2$ of model                    | 0.21                 | 0.21                  | 0.04                |

\*GOLD is the Global Initiative on Obstructive Lung Disease. Stage 2 or higher COPD is defined as subjects with an FEV1/FVC <70% and an FEV1 <80% predicted.

†Some never and former smokers had cotinine levels >15♣ng/ml, suggesting misclassification of smoking status
